# Supplementary material
Source: Springer Nature journal article supplement (https://www.springermedizin.de/resource/supplementary/12968_2013_3939_MOESM4_ESM.pdf/9584910)
Supplement: MOESM4 [file 9584910]

**Large Vessel Segments**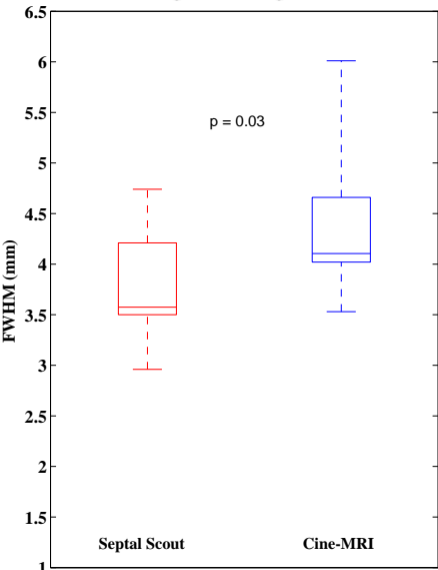**Small Vessel Segments**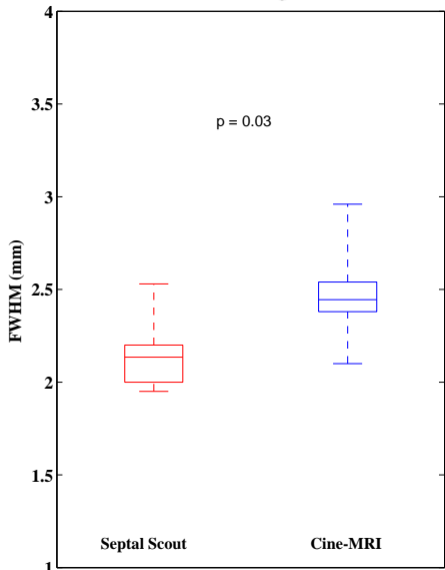**Imaging Window Selection Technique****Imaging Window Selection Technique**
